# Supplementary material
Source: PubMed Central journal article supplement (PMC6402828)
Supplement: NIHMS1515780-supplement-3.pdf [file NIHMS1515780-supplement-3.pdf]

**Supplementary Table 1. Details of the databases used and the specific SNPs associated with the indicated genes.**

**Data Aggregation**

| Database Name                                                  | DOI                         |
|----------------------------------------------------------------|-----------------------------|
| GWASdb                                                         | 10.1093/nar/gkr1182         |
| NHGRI GWAS Catalog                                             | 10.1093/nar/gkt1229         |
| Genetic Association Database                                   | 10.1038/ng0504-431          |
| GEO Signatures of Differentially Expressed Genes for Diseases  | 10.1093/nar/gks1193         |
| dbGAP: Database of Genotypes and Phenotypes                    | 10.1093/nar/gkt1211         |
| CTD Gene-Disease Associations                                  | 10.1093/nar/gku935          |
| DISEASES Experimental Gene-Disease Association Evidence Scores | 10.1016/j.ymeth.2014.11.020 |

| SNPs | Gene    | Chr | Position  | SNP ID     | PubMed ID | adj P-value | Population                                                                     | Trait                | SNP Type   |
|------|---------|-----|-----------|------------|-----------|-------------|--------------------------------------------------------------------------------|----------------------|------------|
|      | Elmo1   | 7   | 37436854  | rs11984075 | 21383967  | 5.00E-08    | European(38053)                                                                | Celiac & RA          | Intron     |
|      | Elmo1   | 7   | 37427351  | rs75351767 | 23143596  | 2.94E-07    | European(27345)                                                                | RA                   | Intron     |
|      | Elmo1   | 7   | 37427351  | rs75351767 | 23143596  | 3.85E-05    | European(27345)                                                                | RA (CCP positive)    | Intron     |
|      | Elmo1   | 7   | 37427351  | rs75351767 | 23143596  | 5.95E-05    | European(27345)                                                                | RA (CCP negative)    | Intron     |
|      | Elmo1   | 7   | 37067395  | rs10488029 | 23382691  | 4.00E-06    | European(2247)                                                                 | IgG glycosylation    | Intron     |
|      | Rac1    | 7   | 6434904   | rs836472   | 21452313  | 1.28E-04    | East Asian (1558)                                                              | RA                   | Exon 4     |
|      | Dock2   | 5   | 169461547 | rs3763048  | 23382691  | 9.00E-06    | European(2247)                                                                 | IgG glycosylation    | Intron     |
|      | Ptprc   | 1   | 198640488 | rs17668708 | 24390342  | 1.70E-05    | East Asian(22515), European(57284),ALL(79799)                                  | RA                   | Intron     |
|      | Ptprc   | 1   | 198640488 | rs17668708 | 24390342  | 1.80E-05    | East Asian(22515) European(57284) ALL(79799)                                   | RA                   | Intron     |
|      | Ptprc   | 1   | 198700442 | rs10919563 | 22446963  | 3.30E-04    | Japanese(20965) ALL(20965)                                                     | RA                   | Intron     |
|      | Ptprc   | 1   | 198700442 | rs10919563 | 24449572  | 7.18E-05    | European(8305) ALL(8305)                                                       | RA                   | Intron     |
|      | Ptprc   | 1   | 198700442 | rs10919563 | 23143596  | 1.25E-10    | European(27345) ALL(27345)                                                     | RA                   | Intron     |
|      | Lgals3  | 14  | 55138318  | rs4652     | 21475983  | 9.00E-03    | Taiwanese(151 RA patients, 182 healthy subjects)                               | RA                   | Missense   |
|      | Cflar   | 2   | 201289674 | rs6715284  | 24390342  | 2.00E-09    | 58284 European, 22515 East Asian; replication: 9576 European, 13263 East Asian | RA                   | Intron     |
|      | Cflar   | 2   | 201289674 | rs6715284  | 24390342  | 3.00E-09    | 58284 European, 22515 East Asian; replication: 9576 European, 13263 East Asian | RA                   | Intron     |
|      | Cd84    | 1   | 160513456 | rs1503860  | 23555300  | 1.38E-07    | European(2706) ALL(2706)                                                       | RA, αTNF Tx Response | UTR-3      |
|      | Cd84    | 1   | 160516308 | rs6427528  | 23555300  | 2.00E-06    | European(2706) ALL(2706)                                                       | RA, αTNF Tx Response | UTR-3      |
|      | Cd84    | 1   | 160516308 | rs6427528  | 23555300  | 7.78E-08    | European(2706) ALL(2706)                                                       | RA, αTNF Tx Response | UTR-3      |
|      | Tnfaip3 | 6   | 138195151 | rs5029937  | 22446963  | 1.40E-07    | Japanese(20965) ALL(20965)                                                     | RA                   | Intron     |
|      | Tnfaip3 | 6   | 138196066 | rs2230926  | 20453841  | 2.00E-06    | Japanese(5683) ALL(5683)                                                       | RA                   | Missense   |
|      | Tnfaip3 | 6   | 138197506 | rs5029949  | 23143596  | 3.51E-08    | European(27345) ALL(27345)                                                     | RA                   | Intron     |
|      | Tnfaip3 | 6   | 137685367 | rs6920220  | 17982456  | 1.00E-07    | NOPOP(397), Framingham(1211)                                                   | RA                   | Intron     |
|      | Tnfaip3 | 6   | 137685367 | rs6920220  | 24449572  | 3.00E-08    | European(3223 RA cases, 5,272 controls)                                        | RA                   | Intron     |
|      | Tnfaip3 | 6   | 137681500 | rs10499194 | 17982456  | 1.00E-09    | NOPOP(397), Framingham(1211)                                                   | RA                   | Intron     |
|      | Tnfaip3 | 6   | 137906227 | rs7752903  | 24390342  | 7.00E-11    | East Asian(22515) European(57284) ALL(79799)                                   | RA                   | Intergenic |
|      | Tnfaip3 | 6   | 137685367 | rs6920220  | 20453842  | 9.00E-13    | European (5539 patient; 20169 control)                                         | RA                   | Intron     |
|      | Tnfaip3 | 6   | 137906227 | rs7752903  | 24390342  | 2.00E-20    | East Asian(22515) European(57284) ALL(79799)                                   | RA                   | Intergenic |
|      | Tnfaip3 | 6   | 137906227 | rs7752903  | 24390342  | 2.00E-29    | East Asian(22515) European(57284) ALL(79799)                                   | RA                   | Intergenic |
|      | Tnfaip3 | 6   | 138227364 | rs7752903  | 23143596  | 3.15E-08    | European(27345) ALL(27345)                                                     | RA                   | Intergenic |
|      | Tnfaip3 | 6   | 138242437 | rs6932056  | 23143596  | 3.93E-05    | European(27345) ALL(27345)                                                     | RA                   | Intergenic |
|      | Tnfaip3 | 6   | 138243700 | rs61117627 | 23143596  | 1.25E-08    | European(27345) ALL(27345)                                                     | RA                   | Intergenic |
|      | Tnfaip3 | 6   | 138243739 | rs58721818 | 23143596  | 5.94E-12    | European(27345) ALL(27345)                                                     | RA                   | Intergenic |
|      | Tnfaip3 | 6   | 138243739 | rs58721818 | 23143596  | 4.07E-09    | European(27345) ALL(27345)                                                     | RA                   | Intergenic |

**Supplementary Table 2. Neutrophil-specific ELMO1 protein interactome.**

| <b>Protein</b>                                              | <b>Gene</b>   |
|-------------------------------------------------------------|---------------|
| Alpha-actinin-1                                             | <b>Actn1</b>  |
| Talin-1                                                     | <b>Tln1</b>   |
| Adenylyl cyclase-associated protein 1                       | <b>Cap1</b>   |
| SUN domain-containing protein 2                             | <b>Sun2</b>   |
| Receptor-type tyrosine-protein phosphatase C                | <b>Ptprc</b>  |
| ATP synthase subunit beta, mitochondrial                    | <b>Atp5b</b>  |
| Transitional endoplasmic reticulum ATPase                   | <b>Vcp</b>    |
| Glycogen phosphorylase, liver form                          | <b>Pygl</b>   |
| Integrin alpha-M                                            | <b>Itgam</b>  |
| Matrix metalloproteinase-9                                  | <b>Mmp9</b>   |
| C5a anaphylatoxin chemotactic receptor 1                    | <b>C5ar1</b>  |
| Galectin-3                                                  | <b>Lgals3</b> |
| Tubulin beta-4B chain                                       | <b>Tubb4b</b> |
| Tubulin alpha-1B chain                                      | <b>Tuba1b</b> |
| Tubulin alpha-4A chain                                      | <b>Tuba4a</b> |
| Aldehyde dehydrogenase, mitochondrial                       | <b>Aldh2</b>  |
| Galactocerebrosidase                                        | <b>Galc</b>   |
| Glyceraldehyde-3-phosphate dehydrogenase                    | <b>Gapdh</b>  |
| Hexokinase-3                                                | <b>Hk3</b>    |
| Leukocyte immunoglobulin-like receptor subfamily B member 3 | <b>Lilrb3</b> |
| Ferritin light chain 1                                      | <b>Ftl1</b>   |
| 14-3-3 protein theta                                        | <b>Ywhaq</b>  |
| 14-3-3 protein eta                                          | <b>Ywhah</b>  |
| Hypoxia up-regulated protein 1                              | <b>Hyou1</b>  |
| Hemoglobin subunit beta-1                                   | <b>Hbb-b1</b> |
| Hemoglobin subunit alpha                                    | <b>Hba</b>    |
| Glucose-6-phosphate 1-dehydrogenase X (G6PD)                | <b>G6pdx</b>  |
| 40S ribosomal protein S8                                    | <b>Rps8</b>   |
| Cytochrome b-245 heavy chain (Nox2, gp91phox)               | <b>Cybb</b>   |
| Cytoskeleton-associated protein 4                           | <b>Ckap4</b>  |
| Clathrin heavy chain 1                                      | <b>Cltc</b>   |

Supplementary Table 3. *Elmo1* regulates shared and cell type-specific transcriptional programs in neutrophils and macrophages.

*Elmo1* regulated genes

Fold Change (log2) = *Elmo1*<sup>+/+</sup>/*Elmo1*<sup>-/-</sup>

| Shared<br><u>Symbol</u> | Fold Change (log2) |                    | Neutrophil-specific genes regulated by <i>Elmo1</i> |                           | Macrophage-specific genes regulated by <i>Elmo1</i> |                           |
|-------------------------|--------------------|--------------------|-----------------------------------------------------|---------------------------|-----------------------------------------------------|---------------------------|
|                         | <u>Neutrophils</u> | <u>Macrophages</u> | <u>Symbol</u>                                       | <u>Fold Change (log2)</u> | <u>Symbol</u>                                       | <u>Fold Change (log2)</u> |
| <i>Elmo1</i>            | 2.880464187        | 2.355475856        | <i>Pmaip1</i>                                       | -0.628710496              | <i>Il9r</i>                                         | -0.941080499              |
| <i>Aoah</i>             | 0.915850744        | 0.56933025         | <i>Dip2c</i>                                        | -0.558184818              | <i>Igkv9-120</i>                                    | -0.624630451              |
| <i>Ero1lb</i>           | 1.372282657        | 0.852185623        | <i>Lars2</i>                                        | -0.514366097              | <i>Cxcl1</i>                                        | -0.52620906               |
| <i>Gpr137b</i>          | -1.979956104       | -0.927126864       | <i>Gpr132</i>                                       | -0.498829307              | <i>Camk2b</i>                                       | -0.488972363              |
| <i>Gpr137b-ps</i>       | 2.617272065        | 2.992377917        | <i>H2-Q7</i>                                        | -0.485226506              | <i>Igkv4-59</i>                                     | -0.428026921              |
| <i>Hist1h2bc</i>        | 0.39396578         | 0.742381795        | <i>H3f3b</i>                                        | -0.472989058              | <i>Ighv8-8</i>                                      | -0.424412158              |
| <i>Zkscan8</i>          | -0.571637572       | -0.355224675       | <i>Impact</i>                                       | -0.457510572              | <i>Ighv14-3</i>                                     | -0.411677221              |
| <i>Stard3nl</i>         | -0.396427744       | 0.430240833        | <i>Gm23935</i>                                      | -0.454457801              | <i>Ighv10-1</i>                                     | -0.409746982              |
| <i>Ggps1</i>            | -0.549251668       | 0.460340538        | <i>Sertad3</i>                                      | -0.4461594                | <i>Igkv16-104</i>                                   | -0.394899331              |
| <i>Hist1h4i</i>         | -0.696696873       | 0.435461088        | <i>CT010467.1</i>                                   | -0.439970046              | <i>Amigo1</i>                                       | -0.367684067              |
|                         |                    |                    | <i>H2-Q8</i>                                        | -0.436343221              | <i>Phldb1</i>                                       | -0.365132178              |
|                         |                    |                    | <i>Thbs1</i>                                        | -0.418092546              | <i>Scand1</i>                                       | -0.293073708              |
|                         |                    |                    | <i>Clec7a</i>                                       | -0.401047706              | <i>Syk</i>                                          | -0.155228169              |
|                         |                    |                    | <i>Chrm3</i>                                        | -0.382221472              | <i>Mvd</i>                                          | 0.159542443               |
|                         |                    |                    | <i>Mir22hg</i>                                      | -0.37975576               | <i>Snx6</i>                                         | 0.17639781                |
|                         |                    |                    | <i>Cirbp</i>                                        | -0.363829499              | <i>Stard4</i>                                       | 0.181372197               |
|                         |                    |                    | <i>Wsb1</i>                                         | -0.363416986              | <i>Sc5d</i>                                         | 0.223028415               |
|                         |                    |                    | <i>Btg1</i>                                         | -0.356631086              | <i>Twf1</i>                                         | 0.225992578               |
|                         |                    |                    | <i>Slc3a2</i>                                       | -0.336040701              | <i>Fgd4</i>                                         | 0.237930297               |
|                         |                    |                    | <i>Srgn</i>                                         | -0.335775941              | <i>Zak</i>                                          | 0.250852397               |
|                         |                    |                    | <i>Lgals8</i>                                       | -0.334898605              | <i>Dhcr7</i>                                        | 0.253971026               |
|                         |                    |                    | <i>Dtd1</i>                                         | -0.334796861              | <i>Ndufaf7</i>                                      | 0.257936666               |
|                         |                    |                    | <i>Pdcd5</i>                                        | -0.317530307              | <i>Nsdhl</i>                                        | 0.268383558               |
|                         |                    |                    | <i>Frat2</i>                                        | -0.315335873              | <i>Pbx1</i>                                         | 0.269157445               |
|                         |                    |                    | <i>Pgrmc1</i>                                       | -0.312536956              | <i>Mmab</i>                                         | 0.289483153               |
|                         |                    |                    | <i>Pik3c3</i>                                       | -0.307242742              | <i>Hmgcs1</i>                                       | 0.305091343               |
|                         |                    |                    | <i>Plekha1</i>                                      | -0.303084336              | <i>Igkv12-89</i>                                    | 0.307608709               |
|                         |                    |                    | <i>Metrn1</i>                                       | -0.299759386              | <i>Idi1</i>                                         | 0.31024232                |
|                         |                    |                    | <i>2410006H16Rik</i>                                | -0.29611882               | <i>Lss</i>                                          | 0.315296839               |
|                         |                    |                    | <i>Tnfrsf13</i>                                     | -0.294815251              | <i>Tagap</i>                                        | 0.316231319               |
|                         |                    |                    | <i>Vnn3</i>                                         | -0.293582705              | <i>Fcor</i>                                         | 0.409777107               |
|                         |                    |                    | <i>Tspan13</i>                                      | -0.291364989              | <i>Ifitm6</i>                                       | 0.425752082               |
|                         |                    |                    | <i>Fundc2</i>                                       | -0.288076372              | <i>Lipn</i>                                         | 0.442843861               |
|                         |                    |                    | <i>H2-Q10</i>                                       | -0.277520521              | <i>Cfp</i>                                          | 0.456862451               |
|                         |                    |                    | <i>Gm9733</i>                                       | -0.268712697              | <i>Hfe</i>                                          | 0.612284422               |
|                         |                    |                    | <i>Eif1</i>                                         | -0.260132528              | <i>Akr1c12</i>                                      | 0.695890394               |
|                         |                    |                    | <i>Cd84</i>                                         | -0.256804425              | <i>Akr1e1</i>                                       | 0.797689112               |
|                         |                    |                    | <i>Tob1</i>                                         | -0.255245997              |                                                     |                           |
|                         |                    |                    | <i>N4bp2l1</i>                                      | -0.247864369              |                                                     |                           |
|                         |                    |                    | <i>Klra2</i>                                        | -0.241531326              |                                                     |                           |
|                         |                    |                    | <i>Amica1</i>                                       | -0.238120316              |                                                     |                           |
|                         |                    |                    | <i>Smim3</i>                                        | -0.232852118              |                                                     |                           |
|                         |                    |                    | <i>Fcho2</i>                                        | -0.210485649              |                                                     |                           |
|                         |                    |                    | <i>Vamp3</i>                                        | -0.209811519              |                                                     |                           |
|                         |                    |                    | <i>Rps14</i>                                        | -0.204735992              |                                                     |                           |
|                         |                    |                    | <i>Slc44a1</i>                                      | -0.199422135              |                                                     |                           |
|                         |                    |                    | <i>Arg2</i>                                         | -0.194031715              |                                                     |                           |
|                         |                    |                    | <i>Hgsnat</i>                                       | -0.192914512              |                                                     |                           |
|                         |                    |                    | <i>Cd24a</i>                                        | -0.182327986              |                                                     |                           |
|                         |                    |                    | <i>Gng2</i>                                         | -0.18025398               |                                                     |                           |
|                         |                    |                    | <i>Smim7</i>                                        | -0.161439569              |                                                     |                           |
|                         |                    |                    | <i>Dazap2</i>                                       | -0.142941473              |                                                     |                           |
|                         |                    |                    | <i>Bmx</i>                                          | -0.118902286              |                                                     |                           |
|                         |                    |                    | <i>Atp8b4</i>                                       | 0.166880622               |                                                     |                           |
|                         |                    |                    | <i>Ankfy1</i>                                       | 0.168936293               |                                                     |                           |
|                         |                    |                    | <i>Ptpn9</i>                                        | 0.187108781               |                                                     |                           |
|                         |                    |                    | <i>N4bp1</i>                                        | 0.191707215               |                                                     |                           |
|                         |                    |                    | <i>Mbnl2</i>                                        | 0.199264563               |                                                     |                           |
|                         |                    |                    | <i>Pfkfb3</i>                                       | 0.200305066               |                                                     |                           |
|                         |                    |                    | <i>Numb</i>                                         | 0.201214808               |                                                     |                           |
|                         |                    |                    | <i>Gabpb2</i>                                       | 0.201288932               |                                                     |                           |
|                         |                    |                    | <i>Ubp1</i>                                         | 0.201388297               |                                                     |                           |
|                         |                    |                    | <i>Elovl1</i>                                       | 0.201603337               |                                                     |                           |
|                         |                    |                    | <i>Brd3</i>                                         | 0.204708411               |                                                     |                           |
|                         |                    |                    | <i>Ctr9</i>                                         | 0.206332067               |                                                     |                           |
|                         |                    |                    | <i>Suv420h1</i>                                     | 0.211614188               |                                                     |                           |
|                         |                    |                    | <i>Ncoa3</i>                                        | 0.213438113               |                                                     |                           |
|                         |                    |                    | <i>Atad2b</i>                                       | 0.215863246               |                                                     |                           |
|                         |                    |                    | <i>Stard8</i>                                       | 0.215987306               |                                                     |                           |

|                      |             |
|----------------------|-------------|
| <i>Arhgap27</i>      | 0.218104276 |
| <i>Ncoa1</i>         | 0.219942667 |
| <i>Eya3</i>          | 0.220687397 |
| <i>Clip1</i>         | 0.223352871 |
| <i>Kidins220</i>     | 0.226765126 |
| <i>Arhgef11</i>      | 0.229629156 |
| <i>Myo9b</i>         | 0.234041244 |
| <i>Tbc1d1</i>        | 0.236894876 |
| <i>Arid2</i>         | 0.237310339 |
| <i>Utrn</i>          | 0.237403681 |
| <i>Myo18a</i>        | 0.239499165 |
| <i>Tbc1d2</i>        | 0.241547768 |
| <i>Ncor1</i>         | 0.24221615  |
| <i>Rbbp6</i>         | 0.242609043 |
| <i>Arhgef18</i>      | 0.243807252 |
| <i>Tcf20</i>         | 0.248062806 |
| <i>Fanca</i>         | 0.248680134 |
| <i>Jmjd1c</i>        | 0.250095307 |
| <i>Fkbp5</i>         | 0.251505884 |
| <i>Upf2</i>          | 0.251999657 |
| <i>B430306N03Rik</i> | 0.252835627 |
| <i>Smarcc2</i>       | 0.253832348 |
| <i>Aff1</i>          | 0.25537644  |
| <i>Chdh</i>          | 0.257424602 |
| <i>Nhsl2</i>         | 0.258119973 |
| <i>Hcfc1</i>         | 0.258815495 |
| <i>Tirap</i>         | 0.259087986 |
| <i>Card6</i>         | 0.259716482 |
| <i>Rnf24</i>         | 0.259867686 |
| <i>C2cd3</i>         | 0.260808335 |
| <i>Ston2</i>         | 0.261387253 |
| <i>Tnrc18</i>        | 0.262860308 |
| <i>Usf3</i>          | 0.264411198 |
| <i>Lhfp12</i>        | 0.266980618 |
| <i>Arid1a</i>        | 0.267214206 |
| <i>Rap1gap2</i>      | 0.267521425 |
| <i>6430548M08Rik</i> | 0.267597881 |
| <i>Mlxip</i>         | 0.267921246 |
| <i>Tet3</i>          | 0.268640727 |
| <i>Akna</i>          | 0.271742321 |
| <i>Pag1</i>          | 0.27209798  |
| <i>Sipa1l2</i>       | 0.272302126 |
| <i>Maml1</i>         | 0.272642922 |
| <i>Cep350</i>        | 0.273387752 |
| <i>Smarca4</i>       | 0.274470545 |
| <i>Ccdc88b</i>       | 0.275208681 |
| <i>Golga3</i>        | 0.276662702 |
| <i>Bdp1</i>          | 0.281903    |
| <i>Hivep1</i>        | 0.283744591 |
| <i>Mrpl49</i>        | 0.286036149 |
| <i>Myo5a</i>         | 0.286524538 |
| <i>Sh2b3</i>         | 0.286606631 |
| <i>Kmt2c</i>         | 0.287165544 |
| <i>Cdan1</i>         | 0.287408514 |
| <i>Mkl1</i>          | 0.288337545 |
| <i>Tnrc6c</i>        | 0.289570163 |
| <i>Myo1d</i>         | 0.290276122 |
| <i>Iqsec1</i>        | 0.291628348 |
| <i>Baz2a</i>         | 0.292944639 |
| <i>Prrc2a</i>        | 0.294453313 |
| <i>Nin</i>           | 0.295845503 |
| <i>Stk10</i>         | 0.297485543 |
| <i>Fry</i>           | 0.299543296 |
| <i>Bptf</i>          | 0.300894009 |
| <i>Rhbdf2</i>        | 0.30124038  |
| <i>Zmiz1</i>         | 0.301604116 |
| <i>Anks1</i>         | 0.302136879 |
| <i>Dhrs9</i>         | 0.304115911 |
| <i>Trip11</i>        | 0.304697414 |
| <i>Inhba</i>         | 0.306027908 |
| <i>A430078G23Rik</i> | 0.306921133 |
| <i>Kat6a</i>         | 0.307754591 |
| <i>Trim16</i>        | 0.307819367 |
| <i>Yeats2</i>        | 0.308136371 |
| <i>Dopey2</i>        | 0.309129701 |
| <i>Golga4</i>        | 0.312631963 |

|                      |             |
|----------------------|-------------|
| <i>Cflar</i>         | 0.312719209 |
| <i>Magi3</i>         | 0.313564187 |
| <i>Kmt2d</i>         | 0.314653079 |
| <i>Ep300</i>         | 0.318920934 |
| <i>Ncoa6</i>         | 0.323188747 |
| <i>Kmt2a</i>         | 0.3232111   |
| <i>Rrbp1</i>         | 0.323308346 |
| <i>Cep250</i>        | 0.323557717 |
| <i>Myh9</i>          | 0.325344123 |
| <i>Prrc2c</i>        | 0.326548    |
| <i>Zfp609</i>        | 0.329623137 |
| <i>Clasp1</i>        | 0.331041808 |
| <i>Plau</i>          | 0.331788561 |
| <i>Cdk12</i>         | 0.334035703 |
| <i>Erc1</i>          | 0.334402278 |
| <i>Prrc2b</i>        | 0.336088342 |
| <i>Dcp1a</i>         | 0.336764434 |
| <i>Ppp1r10</i>       | 0.337993755 |
| <i>Zfyve26</i>       | 0.339031014 |
| <i>Setd1b</i>        | 0.339088183 |
| <i>Tor4a</i>         | 0.341749945 |
| <i>Golgb1</i>        | 0.342575734 |
| <i>Rreb1</i>         | 0.342999948 |
| <i>Kif21b</i>        | 0.343475784 |
| <i>Plec</i>          | 0.353943667 |
| <i>Nuak2</i>         | 0.358042945 |
| <i>Gpr84</i>         | 0.359365747 |
| <i>Dock5</i>         | 0.36174605  |
| <i>Ap5b1</i>         | 0.361964531 |
| <i>Spen</i>          | 0.367309865 |
| <i>Lmo1</i>          | 0.367974677 |
| <i>Ankrd11</i>       | 0.371439058 |
| <i>Camkk1</i>        | 0.392422859 |
| <i>Rasa2</i>         | 0.40345356  |
| <i>Bcor1</i>         | 0.403795233 |
| <i>Irf1</i>          | 0.409037261 |
| <i>Ccdc88c</i>       | 0.430620672 |
| <i>C130026I21Rik</i> | 0.448205772 |
| <i>Zfp142</i>        | 0.457135437 |
